# THE AMERICAN JOURNAL OF PSYCHIATRY

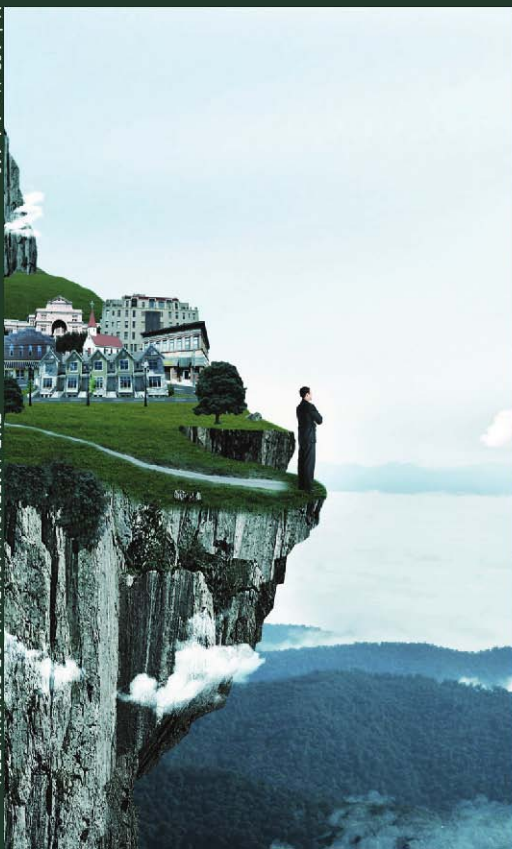

**A Quality-Based Review of  
Randomized Controlled Trials of  
Psychodynamic Psychotherapy**  
Andrew J. Gerber, M.D., Ph.D., et al. 19

**The Structure of Genetic and  
Environmental Risk Factors for  
Syndromal and Subsyndromal  
Common DSM-IV Axis I and All  
Axis II Disorders**  
Kenneth S. Kendler, M.D., et al. 29

◀ **Altitude, Gun Ownership, Rural  
Areas, and Suicide**  
Namkug Kim, Ph.D., et al. 49

**Childhood Trauma and Children's  
Emerging Psychotic Symptoms: A  
Genetically Sensitive Longitudinal  
Cohort Study**  
Louise Arseneault, Ph.D., et al. 65

**Continuing Medical Education** 107

**January 2011**  
Volume 168 • Number 1

Official Journal of the  
AMERICAN PSYCHIATRIC ASSOCIATION

[ajp.psychiatryonline.org](http://ajp.psychiatryonline.org)
